# Supplementary material for: NLRC5 elicits antitumor immunity by enhancing processing and presentation of tumor antigens to CD8+ T lymphocytes
Source: PubMed Central journal article supplement — Oncoimmunology. 2016 Mar 28;5(6):e1151593. doi: 10.1080/2162402X.2016.1151593 (PMC4938303; doi:10.1080/2162402x.2016.1151593), 2016-03-28
Supplement: koni-05-06-1151593-s001.pdf [file koni-05-06-1151593-s001.pdf]

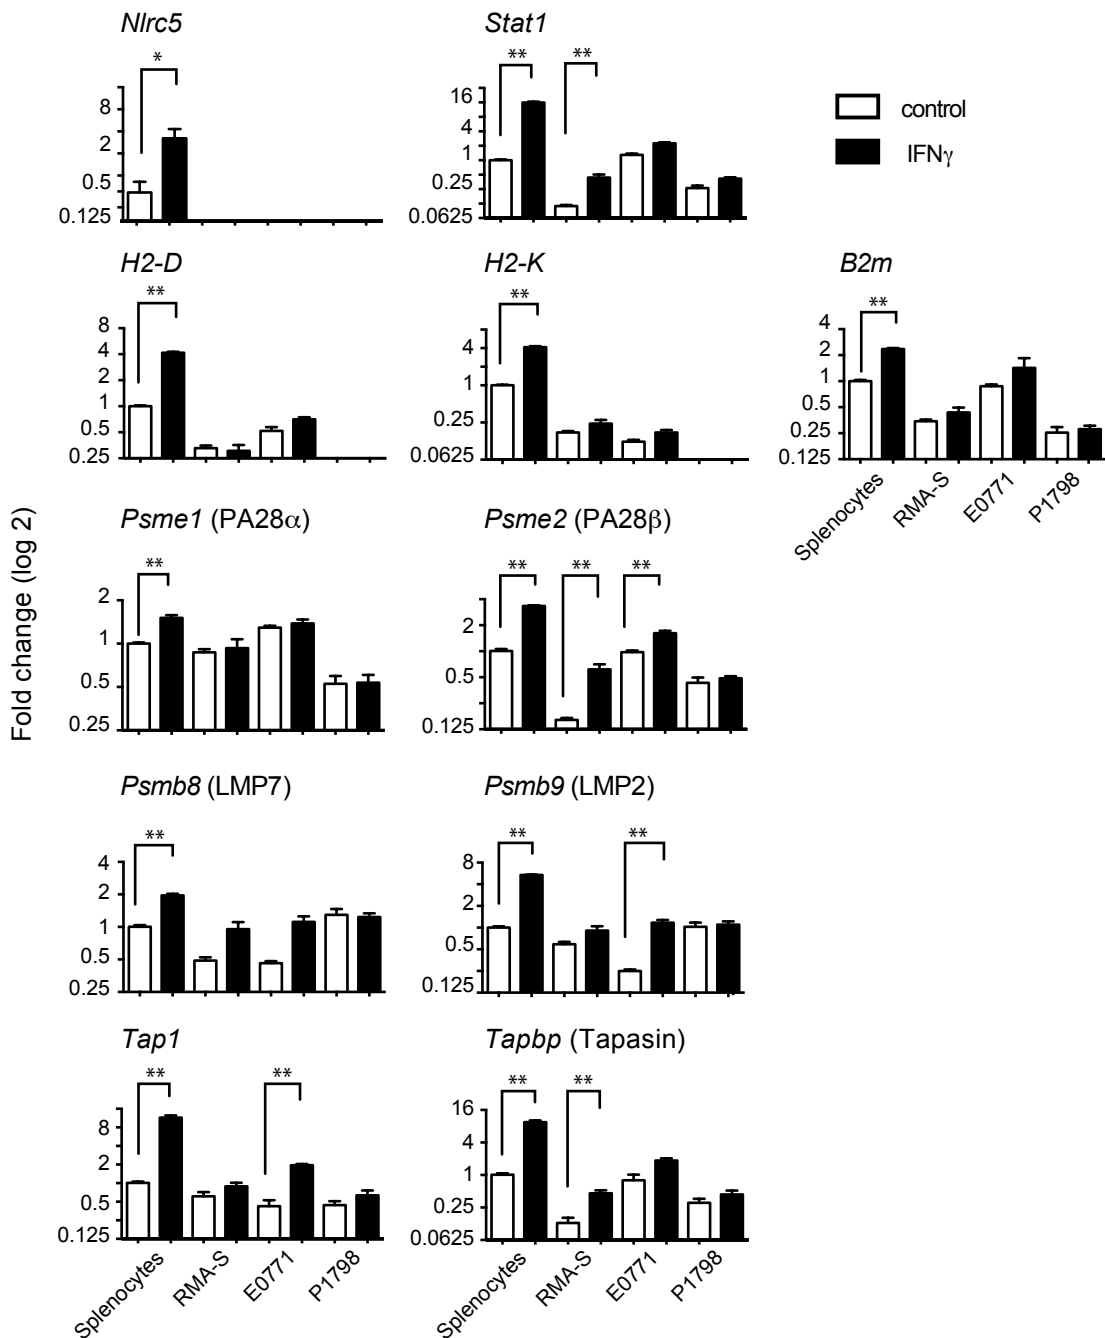

**Supplementary Fig. S1. NLRC5 gene expression in mouse tumor cell lines.** Mouse T-lymphoma cell lines RMA-S<sup>1</sup> and P1798<sup>2</sup> and the mammary carcinoma cell line E0771<sup>3</sup> were evaluated by qPCR for the expression of *Nlrc5* and the indicated MHC-I pathway genes before and after stimulation with IFN $\gamma$  (500 pg/ml) for 24h. C57BL/6 splenocytes stimulated with IFN $\gamma$  served as control. Mann-Whittney U test: \*\*  $p < 0.01$ .

1. Townsend A, Ohlen C, Bastin J, Ljunggren HG, Foster L, Karre K. Association of class I major histocompatibility heavy and light chains induced by viral peptides. *Nature* 1989; 340:443-8.
2. Thompson EA, Jr. Properties of a cell-culture line derived from lymphosarcoma P1798. *Mol Cell Endocrinol* 1980; 17:95-102.
3. Sirotnak FM, DeGraw JI, Schmid FA, Goutas LJ, Moccio DM. New folate analogs of the 10-deaza-aminopterin series. Further evidence for markedly increased antitumor efficacy compared with methotrexate in ascitic and solid murine tumor models. *Cancer Chemother Pharmacol* 1984; 12:26-30.

**hsNLRC5: NP\_115582.4 (1866 aa)**  
**mmNLRC5 : NP\_001028379.2 (1915 aa)**

|                              |      |                        |         |        |        |        |        |      |       |       |       |       |      |     |       |      |
|------------------------------|------|------------------------|---------|--------|--------|--------|--------|------|-------|-------|-------|-------|------|-----|-------|------|
| <a href="#">NP_115582</a>    | 1    | MDPVLGQLGNKNLWSCLVRLLT | KDPEWLN | NAKMKF | FLPNTD | LDLSDR | NETL   | DP   | QRVIL | QLNKL | HVQGS | DTWQ  | SFI  | HCV | CMQL  | 80   |
| <a href="#">NP_001028379</a> | 1    | MDAESIRLNNE            | NLWAWL  | VRLLS  | SKNPEW | L      | SAKLRS | FLP  | TMDL  | DCSY  | EP    | SNPEV | -IHR | QLN | R     | 159  |
| <a href="#">NP_115582</a>    | 81   | EVPLDLE                | VLLSL   | STFGY  | DDG    | FTSQ   | L      | GAE  | GK    | SQ    | PES   | QLH   | HGL  | KR  | PHQ   | 160  |
| <a href="#">NP_001028379</a> | 80   | DVPLDME                | IPLVS   | IW     | GPRDE  | FSK    | QLG    | GAGE | ESC   | FGP   | QLY   | HG    | AK   | RP  | FSY   | 159  |
| <a href="#">NP_115582</a>    | 161  | SQIPG                  | SG-Q    | PHAF   | HQ     | VY     | V      | PP   | ILR   | --    | RATAS | LD    | TP   | E   | G     | 237  |
| <a href="#">NP_001028379</a> | 160  | GVC                    | PGAWL   | TPHS   | -P     | QTYI   | PP     | V    | LQW   | S     | RATAP | L     | DAQ  | E   | G     | 238  |
| <a href="#">NP_115582</a>    | 238  | AHRLC                  | QK      | WAE    | GHLN   | CFQAL  | F      | FE   | F     | R     | Q     | L     | N    | L   | I     | 315  |
| <a href="#">NP_001028379</a> | 239  | AYRLR                  | RWR     | WAQ    | Q      | LDRF   | QAL    | F    | FE    | F     | R     | Q     | L    | N   | M     | 318  |
| <a href="#">NP_115582</a>    | 316  | MGP                    | D       | PG     | P      | V      | L      | F    | S     | H     | L     | C     | N    | G   | T     | 395  |
| <a href="#">NP_001028379</a> | 319  | VGT                    | D       | N      | A      | S      | A      | L    | T     | F     | S     | E     | L    | C   | H     | 398  |
| <a href="#">NP_115582</a>    | 396  | NGRLR                  | S       | L      | C      | A      | V      | P    | A     | L     | C     | V     | A    | C   | L     | 475  |
| <a href="#">NP_001028379</a> | 399  | NARL                   | R       | G      | M      | C      | A      | I    | P     | A     | L     | C     | T    | V   | T     | 478  |
| <a href="#">NP_115582</a>    | 476  | YAK                    | D       | I      | A      | P      | L      | I    | A     | F     | G     | A     | T    | H   | S     | 555  |
| <a href="#">NP_001028379</a> | 479  | S                      | V       | E      | D      | I      | S      | P    | L     | M     | S     | F     | G    | A   | V     | 558  |
| <a href="#">NP_115582</a>    | 556  | GLSD                   | H       | L      | P      | A      | F      | L    | A     | G     | L     | A     | S    | C   | T     | 635  |
| <a href="#">NP_001028379</a> | 559  | GLSD                   | H       | L      | P      | A      | F      | L    | A     | G     | L     | A     | S    | H   | T     | 638  |
| <a href="#">NP_115582</a>    | 636  | PYQ                    | L       | P      | F      | H      | N      | P    | L     | T     | C     | T     | D    | L   | A     | 715  |
| <a href="#">NP_001028379</a> | 639  | P                      | S       | R      | L      | S      | F      | H    | N     | P     | L     | T     | H    | A   | D     | 718  |
| <a href="#">NP_115582</a>    | 716  | LQ                     | M       | L      | G      | L      | A      | G    | S     | K     | I     | T     | A    | R   | G     | 795  |
| <a href="#">NP_001028379</a> | 719  | L                      | K       | T      | L      | G      | L      | T    | G     | S     | R     | I     | T    | A   | Q     | 798  |
| <a href="#">NP_115582</a>    | 796  | TC                     | P       | T      | V      | R      | M      | L    | Q     | A     | R     | E     | A    | D   | I     | 875  |
| <a href="#">NP_001028379</a> | 799  | TC                     | P       | T      | V      | R      | K      | L    | Q     | V     | R     | E     | L    | D   | I     | 877  |
| <a href="#">NP_115582</a>    | 876  | D                      | L       | S      | G      | N      | L      | E    | D     | E     | G     | C     | R    | L   | M     | 955  |
| <a href="#">NP_001028379</a> | 878  | N                      | L       | S      | G      | N      | H      | L    | E     | D     | D     | G     | C    | R   | L     | 957  |
| <a href="#">NP_115582</a>    | 956  | E                      | R       | A      | A      | F      | L      | D    | S     | L     | M     | L     | O    | M   | P     | 1034 |
| <a href="#">NP_001028379</a> | 958  | K                      | G       | R      | A      | P      | L      | S    | I     | F     | V     | S     | P    | V   | T     | 1037 |
| <a href="#">NP_115582</a>    | 1035 | Q                      | S       | L      | N      | S      | E      | N    | L     | S     | D     | A     | V    | L   | G     | 1114 |
| <a href="#">NP_001028379</a> | 1038 | K                      | S       | L      | N      | S      | R      | N    | G     | L     | S     | M     | D    | A   | V     | 1113 |
| <a href="#">NP_115582</a>    | 1115 | S                      | E       | C      | P      | L      | E      | P    | S     | L     | T     | R     | L    | C   | A     | 1194 |
| <a href="#">NP_001028379</a> | 1114 | Q                      | E       | C      | L      | E      | P      | T    | S     | L     | T     | F     | L    | C   | A     | 1193 |
| <a href="#">NP_115582</a>    | 1195 | K                      | V       | D      | L      | R      | S      | L    | H     | H     | A     | T     | L    | H   | F     | 1274 |
| <a href="#">NP_001028379</a> | 1194 | K                      | V       | T      | L      | R      | S      | L    | C     | H     | A     | V     | L    | H   | F     | 1272 |
| <a href="#">NP_115582</a>    | 1275 | L                      | L       | D      | L      | S      | H      | N    | I     | S     | Q     | E     | G    | I   | L     | 1354 |
| <a href="#">NP_001028379</a> | 1273 | W                      | L       | D      | L      | S      | H      | N    | I     | S     | Q     | E     | G    | I   | L     | 1352 |
| <a href="#">NP_115582</a>    | 1355 | E                      | L       | T      | L      | T      | Q      | C    | L     | G     | Q     | L     | A    | I   | L     | 1434 |
| <a href="#">NP_001028379</a> | 1353 | E                      | L       | W      | T      | K      | H      | L    | D     | L     | P     | Q     | L    | T   | M     | 1432 |
| <a href="#">NP_115582</a>    | 1435 | P                      | E       | A      | V      | A      | L      | R    | L     | A     | H     | C     | D    | L   | G     | 1514 |
| <a href="#">NP_001028379</a> | 1433 | S                      | D       | S      | M      | A      | L      | R    | L     | A     | H     | C     | D    | L   | E     | 1512 |
| <a href="#">NP_115582</a>    | 1515 | A                      | S       | G      | L      | G      | H      | C    | H     | L     | E     | E     | L    | D   | L     | 1594 |
| <a href="#">NP_001028379</a> | 1513 | A                      | F       | G      | L      | G      | H      | C    | H     | L     | E     | E     | L    | D   | F     | 1592 |
| <a href="#">NP_115582</a>    | 1595 | C                      | H       | L      | S      | E      | A      | L    | R     | A     | A     | T     | S    | L   | E     | 1674 |
| <a href="#">NP_001028379</a> | 1593 | T                      | Q       | C      | L      | A      | A      | I    | L     | P     | K     | L     | P    | E   | L     | 1672 |
| <a href="#">NP_115582</a>    | 1675 | G                      | D       | P      | T      | A      | L      | G    | L     | A     | Q     | E     | L    | P   | ----- | 1698 |
| <a href="#">NP_001028379</a> | 1673 | G                      | D       | V      | G      | T      | C      | L    | A     | A     | I     | L     | P    | K   | L     | 1752 |
| <a href="#">NP_115582</a>    | 1699 | H                      | L       | G      | P      | G      | A      | L    | S     | L     | A     | Q     | A    | L   | D     | 1778 |
| <a href="#">NP_001028379</a> | 1753 | H                      | L       | G      | P      | E      | G      | A    | L     | S     | L     | A     | Q    | A   | L     | 1832 |
| <a href="#">NP_115582</a>    | 1779 | L                      | L       | G      | D      | E      | V      | A    | A     | E     | L     | A     | Q    | V   | L     | 1858 |
| <a href="#">NP_001028379</a> | 1833 | L                      | L       | G      | D      | E      | V      | A    | A     | E     | L     | A     | Q    | V   | L     | 1912 |
| <a href="#">NP_115582</a>    | 1859 | Q                      | P       | A      | P      | W      | G      | T    | 1866  |       |       |       |      |     |       |      |
| <a href="#">NP_001028379</a> | 1913 | O                      | T       | L      | -----  | 1915   |        |      |       |       |       |       |      |     |       |      |

**Supplementary Fig. S2. Amino acid sequence comparison between human and mouse NLRC5.** Clustal-W analysis shows 62% sequence identity, and 80% similarity with 3% gaps.

# **NLRC5 elicits antitumor immunity by enhancing processing and presentation of tumor antigens to CD8<sup>+</sup> T lymphocytes**

Galaxia M. Rodriguez et al.,

## **Supplementary methods**

### ***Gene expression analysis***

RNA was extracted from B16 cells or its derivatives using RiboZol™ (AMRESCO, Solon, OH) and reverse transcribed using QuantiTect Kit (Qiagen). For qPCR reactions, 100ng of cDNA was used with SYBR Green mix (BioRad) and analyzed on an iQ5 Cyclor (BioRad). All samples were amplified in triplicates and normalized for *36B4* housekeeping gene expression. Relative expression was calculated by ddCt method and corrected for primer efficiencies (1). The primers used for qPCR reactions are given in Table 1.

### ***MTT assay for cell growth***

Proliferation and viability of B16 cells was assessed using 3-(4,5-Dimethylthiazol-2-yl)-2,5-diphenyltetrazolium bromide (MTT; Sigma-Aldrich) reduction assay. Briefly, cells were plated at different densities in 96 well flat-bottom plates. 24h after, MTT solution (4mg/ml; 25µl) was added and cells were incubated for 16-20h at 37°C. The reaction was stopped by 10% SDS-HCl (100µl) and optical density was measured at 570nm in a microplate reader (Bio-Rad).

### ***Flow cytometry for surface markers, intracellular cytokines and CD107 mobilization***

Expression of cell surface and intracellular markers was evaluated by flow cytometry using FACS Canto flow cytometer (Becton Dickinson flow cytometry systems, Mississauga, ON,

Canada). For intracellular cytokine staining, the Cytotfix/Cytoperm™ Plus kit (BD Biosciences) was used according to the manufacturer's instructions. Briefly, Pmel-1 cells were stimulated with antigenic peptides for 5h along with GolgiPlug™. The cells were washed, stained for cell surface markers, fixed, permeabilized and stained for TNF $\alpha$  as described previously (2). Cytotoxic granule exocytosis was assessed by flow cytometry for cell surface expression of CD107b (SEROTEC, Bio-Rad) (3). Flow cytometry data were analyzed using the FlowJo software (Tree Star Inc., Ashland, OR, USA). Antibodies used for flow cytometry are given in Table 2.

## References

1. Pfaffl MW. A new mathematical model for relative quantification in real-time RT-PCR. *Nucleic Acids Res.* 2001;29:e45.
2. Ramanathan S, Dubois S, Chen XL, Leblanc C, Ohashi PS, Ilangumaran S. Exposure to IL-15 and IL-21 enables autoreactive CD8 T cells to respond to weak antigens and cause disease in a mouse model of autoimmune diabetes. *J Immunol.* 2011;186:5131-41.
3. Betts MR, Brenchley JM, Price DA, De Rosa SC, Douek DC, Roederer M, et al. Sensitive and viable identification of antigen-specific CD8<sup>+</sup> T cells by a flow cytometric assay for degranulation. *J Immunol Methods.* 2003;281:65-78.

**Table 1. The primer sequences used in gene expression analysis.**

| Gene ID                          | Gene name    | Sense                   | Anti-sense             | Amplicon size (bp) |
|----------------------------------|--------------|-------------------------|------------------------|--------------------|
| Primer Sequences for mouse genes |              |                         |                        |                    |
| NM_010380.3                      | <i>H2d</i>   | GGGAAACACAGAAAGCCAAG    | AAGTCACAGCCAGACATCTG   | 124                |
| NM_001001892.2                   | <i>H2k</i>   | AGACACAGAAAGCCAAGGG     | CACTTCACAGCCAGAGATCAC  | 122                |
| NM_009735.3                      | <i>B2m</i>   | TGGTCTTTCTGGTGCTTGTC    | GGGTGGAAGTGTGTTACGTAG  | 136                |
| NM_009318.2                      | <i>Tapbp</i> | ATCGTAGCACCATGAAGCC     | TGGCAGGTTTCTTAGACAGG   | 150                |
| NM_013683.2                      | <i>Tap1</i>  | TGGTTCTGGTTCTCTTGATTCTC | CTGGCTATGGTGAGAATGGAC  | 148                |
| NM_013585.2                      | <i>Lmp2</i>  | GAACATCTCCTACAAGTACCGTG | CTGTCTGAATTAGCATCCCTCC | 115                |
| NM_010724.2                      | <i>Lmp7</i>  | ATCGAGATTAACCCTTACCTGC  | AGATGCGTTCCCCATTCC     | 121                |
| NM_009283.4                      | <i>Stat1</i> | GCCGAGAACATACCAGAGAATC  | GATGTATCCAGTTCGCTTAGGG | 141                |
| NM_011190.3                      | <i>Pa28b</i> | CCTTGCTCGCTTTGGTTAAG    | ACCTTCTCCTGAATTGCCAC   | 133                |
| NM_011189.1                      | <i>Pa28a</i> | GTGCTTTTCGCTTTCCCTTC    | TTGCTACACAGGTCTTCACG   | 147                |
| NP_031501.1                      | <i>Rplp0</i> | TCTGGAGGGTGTCCGCAAC     | CTTGACCTTTTTCAGTAAGTGG | 154                |
| NM_001033207.3                   | <i>Nlrc5</i> | AGTGCAGCTGGTGAAGTCTC    | TCCCGGACAGCAAGAGTTTC   | 380                |
| Primer Sequences for human genes |              |                         |                        |                    |
| NM_032206.4                      | <i>NLRC5</i> | AGACCCAGAATGGCTGAACG    | CTGGCTGGTGAACCCATCAT   | 241                |

**Table 2. Antibodies used for flow cytometry.**

| Marker            | mAb clone | Source        | Cat. #      |
|-------------------|-----------|---------------|-------------|
| CD3ε              | 145-2C11  | eBioscience   | 150-0031-82 |
| CD8               | a53-6.7   | eBioscience   | 25-081-82   |
| CD44              | IM7       | BD Pharmingen | 553-133     |
| CD62L             | MEL14     | eBioscience   | 17-0621-83  |
| CD80              | B7-1      | eBioscience   | 17-0801-82  |
| CD107b            | M3/84     | BioLegend     | 108506      |
| H-2D <sup>b</sup> | KH-95     | BioLegend     | 115111      |
| H-2K <sup>b</sup> | AF6-88.5  | BioLegend     | 116507      |
| IL-2              | JES6-5H4  | BD Pharmingen | 560538      |
| PD-L1             | B7-H1     | BioLegend     | 124305      |
| TNFα              | MP6-XT22  | eBioscience   | 1207321-82  |
